# Supplementary material for: Fibroblast growth factor 13-mediated regulation of medium spiny neuron excitability and cocaine self-administration
Source: PubMed Central journal article supplement (PMC10720079; doi:10.3389/fnins.2023.1294567), 2023-11-30
Supplement: Presentation_1.pdf [file Presentation_1.pdf]

## *Supplementary Material*

### 1 Supplementary Figures and Tables

#### 1.1 Supplementary Tables

**Supplementary Table 1**

| Condition          | Peak $I_{NaT}$ Density<br>(pA/pF) | Peak $I_{NaP}$ Density<br>(pA/pF) | $V_{1/2}$ of Activation<br>(mV) | $V_{1/2}$ of Inactivation<br>(mV) |
|--------------------|-----------------------------------|-----------------------------------|---------------------------------|-----------------------------------|
| <i>AAV-shCTRL</i>  | $-20.9 \pm 3.0$ (5)               | $-1.25 \pm 0.43$ (5)              | $-41.6 \pm 2.5$ (5)             | $-59.6 \pm 5.8$ (5)               |
| <i>AAV-shFGF13</i> | $-36.6 \pm 6.3^a$ (5)             | $-5.95 \pm 1.72^b$ (5)            | $-45.6 \pm 2.9$ (5)             | $-58.3 \pm 1.8$ (5)               |

**Supplementary Table 1: *In vivo* genetic silencing of FGF13 in the NAcSh increases  $Na_v$  channel activity of MSNs.** Table summary of voltage-clamp data shown in Figure 2. Data are mean  $\pm$  SEM ( $n$ ).

<sup>a</sup>  $p = 0.0273$ ; AAV-shCTRL vs AAV-shFGF13; Student's t-test.

<sup>b</sup>  $p = 0.0293$ ; AAV-shCTRL + AAV-shFGF13; Student's t-test.

**Supplementary Table 2**

| Condition          | IFF at 220 pA (Hz)           | V <sub>thr</sub> (mV)         | Max Rise (mV/ms)               | Max Decay (mV/ms) | RMP (mV)         | R <sub>in</sub> (MΩ)     |
|--------------------|------------------------------|-------------------------------|--------------------------------|-------------------|------------------|--------------------------|
| <i>AAV-shCTRL</i>  | 17.6 ± 1.8 (10)              | -34.3 ± 3.0 (10)              | 220.7 ± 11.3 (10)              | -49.2 ± 3.2 (10)  | -74.0 ± 1.6 (10) | 137.3 ± 12.4 (10)        |
| <i>AAV-shFGF13</i> | 24.3 ± 1.9 (10) <sup>a</sup> | -42.8 ± 2.2 (10) <sup>b</sup> | 267.6 ± 17.2 (10) <sup>c</sup> | -54.8 ± 2.8 (10)  | -75.5 ± 2.0 (10) | 105.8 ± 8.0 <sup>d</sup> |

**Supplementary Table 2: *In vivo* genetic silencing of FGF13 in the NAcSh increases the intrinsic excitability of MSNs.** Table summary of current-clamp data shown in Figure 3. Data are mean ± SEM (*n*).

<sup>a</sup> *p* = 0.0194; AAV-shCTRL versus AAV-shFGF13; Student's t-test.

<sup>b</sup> *p* = 0.0333; AAV-shCTRL versus AAV-shFGF13; Student's t-test.

<sup>c</sup> *p* = 0.0350; AAV-shCTRL versus AAV-shFGF13; Student's t-test.

<sup>d</sup> *p* = 0.0472; AAV-shCTRL versus AAV-shFGF13; Student's t-test.

## 1.2 Supplementary Figures

### Supplemental Figure 1: Validation of AAV-shFGF13-GFP.

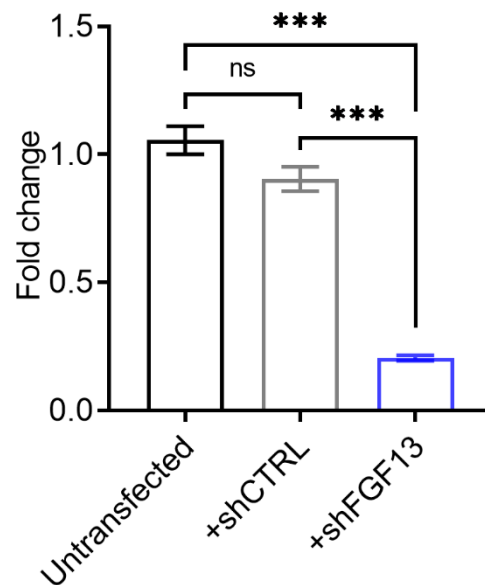

Quantification of FGF13 knockdown efficiency in stem-cell derived neurons that were untransfected, transfected with AAV-shCTRL-GFP, or transfected with AAV-shFGF13-GFP. Data are mean  $\pm$  SEM ( $n = 3$  biological replicates/group). Statistical significance was assessed using a one-way ANOVA with post hoc Tukey's multiple comparisons test: ns, not significant; \*\*\*,  $p < 0.001$ .

### Supplemental Figure 2: *In vivo* genetic silencing of FGF13 in the NAcSh did not alter cocaine acquisition, extinction, or PR.

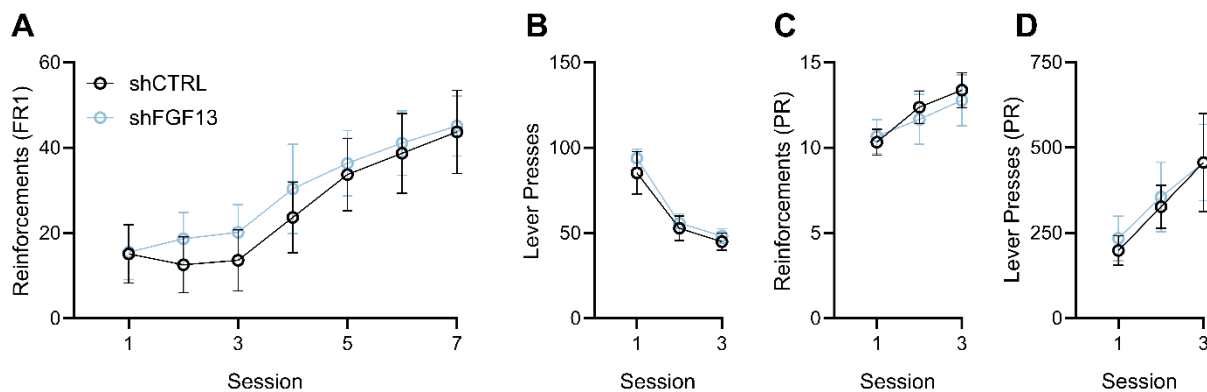

(A) Knockdown of FGF13 in the NAcSh did not alter the number of reinforcements of 0.5 mg/kg/infusion of cocaine in a 4 hour FR1 schedule, (B) number of lever presses during a 3 hour within session extinction protocol, (C) number of reinforcements during a PR schedule, or (D) number of lever presses during a PR schedule. Data are mean  $\pm$  SEM ( $n = 8-10$  rats/group). All data were analyzed via two-way or mixed model ANOVA.
